# Supplementary material for: MALDI-TOF MS as a method for rapid identification of Phytophthora de Bary, 1876
Source: PeerJ journal article supplement (doi:10.7717/peerj.11662), 2021-07-19

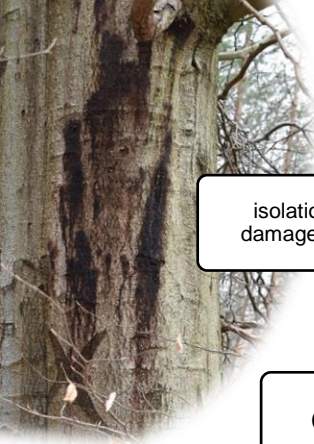

isolation from  
damaged plants

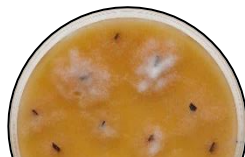

selective agar medium

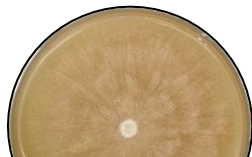

V8A medium

**Czech Collection of Phytopathogenic Oomycetes (CCPO)**

DNA extraction

ITS & COI  
PCR

sequencing

BIOEDIT

BLAST

**NCBI GenBank  
database**

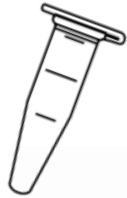

protein extraction

mass spectra  
collection

MALDI Biotyper

**MSP Library**

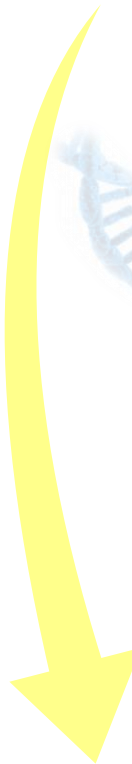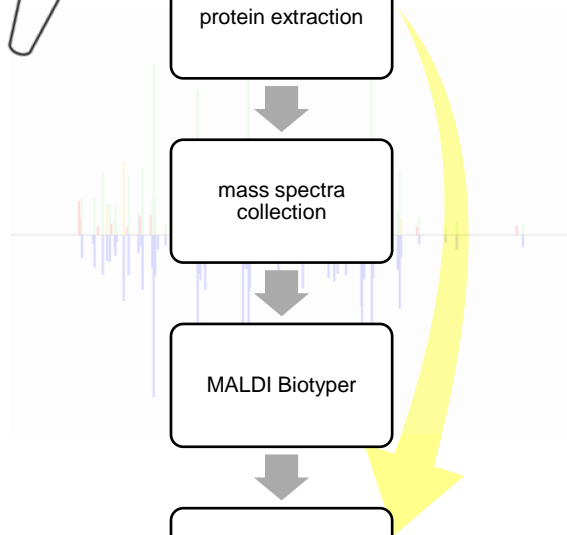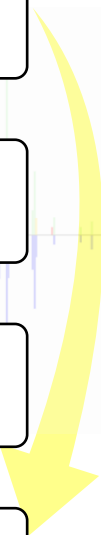

Supplement: Figure_S1_Flow_diagram.pdf [file Figure_S1_Flow_diagram.pdf]
