# Supplementary material for: MALDI-TOF MS as a method for rapid identification of Phytophthora de Bary, 1876
Source: PeerJ. 2021 Jul 19;9:e11662. doi: 10.7717/peerj.11662 (PMC8297470; doi:10.7717/peerj.11662)
Supplement: Supplemental Information 2 [file peerj-09-11662-s002.xlsx]

## Sheet: List1
		GenBank accession numbers
Strain number	Species	COI	ITS
239/08	Phytophthora alni subsp. uniformis Brasier & S.A. Kirk 2004	MT293575
240/08	Phytophthora alni subsp. alni Brasier & S.A. Kirk 2004	MT293576
242/08	Phytophthora multivora P.M. Scott & T. Jung 2009	MT293577
256/09	Phytophthora plurivoraT. Jung & T.I. Burgess 2009		MT350310
286/09	Phytophthora cambivora(Petri) Buisman 1927		MT350311
295/09	Phytophthora lacustris Brasier, Cacciola, Nechw., T. Jung & Bakonyi 2013		MT350312
299/09	Phytophthora alni subsp. uniformis Brasier & S.A. Kirk 2004		MT350313
345/09	Phytophthora ramorumWerres, De Cock & Man in 't Veld 2001		MT350314
361/09	Phytophthora lacustris Brasier, Cacciola, Nechw., T. Jung & Bakonyi 2013		MT350315
366/09	Phytophthora multivora P.M. Scott & T. Jung 2009		MT350316
382/10	Phytophthora cinnamomi Rands 1922		MT350317
385/10	Phytophthora lacustris Brasier, Cacciola, Nechw., T. Jung & Bakonyi 2013		MT350318
393/10	Phytophthora cambivora(Petri) Buisman 1927		MT350319
398/10	Phytophthora lacustris Brasier, Cacciola, Nechw., T. Jung & Bakonyi 2013		MT350320
408/10	Phytophthora gonapodyides (H.E. Petersen) Buisman 1927		MT350321
419/10	Phytophthora gonapodyides (H.E. Petersen) Buisman 1927	MT293578	MT350322
453/11	Phytophthora palmivora (E.J. Butler) E.J. Butler 1919		MT350323
456/11	Phytophthora cf. kelmania*	MT293579	MT350324
483/11	Phytophthora taxon Raspberry*	MT293580	MT350325
518/11	Phytophthora taxon Walnut*	MT293581	MT350326
531/11	Phytophthora hedraiandra De Cock & Man in 't Veld 2004	KJ567086	KJ567083
534/11	Phytophthora cinnamomi Rands 1922		MT350327
544/11	Phytophthora rosacearum E.M. Hansen & W.F. Wilcox 2009		MT350328
578/12	Phytophthora hedraiandra De Cock & Man in 't Veld 2004	KJ567085	KJ567082
617/12	Phytophthora megasperma Drechsler 1931		MT350329
620/12	Phytophthora syringae (Kleb.) Kleb. 1909		MT350330
635/13	Phytophthora citrophthora (R.E. Sm. & E.H. Sm.) Leonian 1925		MT350331
673/13	Phytophthora gregata T. Jung, Stukely & T.I. Burgess 2011	MT293582
734/14	Phytophthora rubi (W.F. Wilcox & J.M. Duncan) Man in 't Veld 2007	MT293583	MT350332
754/15	Phytophthora ramorumWerres, De Cock & Man in 't Veld 2001		MT350333
766/15	Phytophthora polonica Belbahri, E. Moralejo, Calmin & Oszako 2006		MT350334
772/15	Phytophthora pseudosyringae T. Jung & Delatour 2003	KX378014	KX378013
778/15	Phytophthora megasperma Drechsler 1931		MT350335
803/16	Phytophthora chlamydospora × amnicola*	MT293584
806/16	Phytophthora chlamydospora × amnicola*	MT293585
812/16	Phytophthora cryptogea Pethybr. & Laff. 1919		MT350336
829/17	Phytophthora rosacearum E.M. Hansen & W.F. Wilcox 2009	MT293586	MT350337
831/17	Phytophthora taxon Walnut*	MT293587	MT350338
846/17	Phytophthora cryptogea Pethybr. & Laff. 1919	MT293588
851/17	Phytophthora cactorum (Lebert & Cohn) J. Schröt. 1886	MT293589
862/17	Phytophthora cactorum (Lebert & Cohn) J. Schröt. 1886	MT293590
865/17	Phytophthora gregata T. Jung, Stukely & T.I. Burgess 2011		MT350339
890/17	Pythium folliculosum B. Paul 1991	MT293591
* only informally described species or species hybrids described in Brasier et al. 2003 (P. taxon Raspberry, P. taxon Walnut), Abad et al. 2002 (P. kelmania), Nagel et al. 2013 (P. chlamydospora × amnicola)
