# Supplementary material for: MALDI-TOF MS as a method for rapid identification of Phytophthora de Bary, 1876
Source: PeerJ. 2021 Jul 19;9:e11662. doi: 10.7717/peerj.11662 (PMC8297470; doi:10.7717/peerj.11662)
Supplement: Supplemental Information 3 [file peerj-09-11662-s003.xlsx]

## Sheet: List1
		MSP		Best match in database and log score
		P. cactorum	Clade 1a	P. hedraiandra	P. cactorum	P. cactorum	P. hedraiandra	P. cactorum	P. hedraiandra	P. cactorum	P. cactorum	P. hedraiandra
		851.17		531.11/2	851.17/3	851.17/2	531.11/1	862.17/3	531.11/3	862.17/1	862.17/2	578.12/3
		Score		2.605	2.547	2.541	2.468	2.449	2.396	2.36	2.314	1.843
		P. cactorum	Clade 1a	P. cactorum	P. cactorum	P. cactorum	P. cactorum	P. hedraiandra	P. hedraiandra	P. cactorum	P. hedraiandra	P. hedraiandra
		862.17		862.17/2	851.17/2	851.17/3	862.17/3	531.11/3	531.11/1	851.17	578.12/3	578.12/1
		Score		2.82	2.748	2.681	2.581	2.401	2.384	2.349	2.335	2.245
		P. hedraiandra	Clade 1a	P. hedraiandra	P. cactorum	P. cactorum	P. hedraiandra	P. cactorum	P. cactorum	P. cactorum	P. cactorum	P. hedraiandra
		531.11		531.11/3	851.17/3	851.17/2	531.11/2	862.17/1	862.17/3	851.17	862.17/2	578.12/3
		Score		2.796	2.629	2.529	2.48	2.36	2.312	2.295	2.267	2.055
		P. hedraiandra	Clade 1a	P. hedraiandra	P. hedraiandra	P. cactorum	P. cactorum	P. hedraiandra	P. cactorum	P. hedraiandra	P. cactorum	P. polonica
		578.12		578.12/3	578.12/2	862.17/1	862.17/2	531.11/1	851.17/2	531.11/3	862.17/3	766.15/1
		Score		2.785	2.543	2.238	2.135	2.04	2.024	1.933	1.861	1.699
		P. citrophthora	Clade 2a	P. citrophthora	P. citrophthora	P. citrophthora	P. polonica	P. cactorum	P. cactorum	P. gonapodyides	P. polonica	P. hedraiandra
		635.13		635.13/3	635.13/2	081.07	766.15/3	851.17/2	862.17/1	419.10/1	766.15/1	531.11/1
		Score		2.772	2.688	2.482	1.781	1.757	1.628	1.516	1.511	1.477
		P. multivora	Clade 2c	P. multivora	P. multivora	P. pseudosyringae	P. taxon Walnut	P. plurivora	P. gonapodyides	P. pseudosyringae	P. hedraiandra	P. palmivora
		242.08		242.08/2	242.08/1	772.15/2	518.11/3	036.06	408.10	772.15/3	531.11/1	453.11
		Score		2.655	2.59	1.457	1.416	1.363	1.355	1.326	1.289	1.254
		P. multivora	Clade 2c	P. multivora	P. multivora	P. multivora	P. lacustris	P. cinnamomi	P. chlamydospora × amnicola	P. lacustris	P. cinnamomi	P. lacustris
		366.09		366.09/2	366.09/3	366.09	361.09/2	534.11/2	803.16/1	361.09/1	534.11/3	361.09
		Score		2.77	2.588	2.573	1.658	1.626	1.587	1.526	1.51	1.473
		P. plurivora	Clade 2c	P. plurivora	P. plurivora	P. plurivora	P. plurivora	P. plurivora	P. pseudosyringae	P. palmivora	P. cinnamomi	P. palmivora
		256.09		256.09/2	256.09.1	029.06	102.07	036.06	772.15/1	453.11	534.11/1	453.11/2
		Score		2.534	2.52	2.513	2.29	2.101	1.455	1.334	1.284	1.241
		P. pseudosyringae	Clade 3	P. pseudosyringae	P. pseudosyringae	P. plurivora	P. gonapodyides	P. plurivora	P. multivora	P. plurivora	P. cinnamomi	P. megasperma
		772.15		772.15/2	772.15/3	102.07	002.06	256.09	366.09/2	256.09/2	382.10/1	617.12/1
		Score		2.81	2.792	1.531	1.514	1.513	1.491	1.474	1.472	1.446
		P. palmivora	Clade 4	P. palmivora	P. palmivora	P. chlamydospora × amnicola	P. cinnamomi	P. lacustris	P. plurivora	P. cambivora	P. rosacearum	P. cinnamomi
		453.11		453.11/2	453.11	803.16/1	534.11/3	385.10/2	029.06	286.09/1	544.11/1	534.11
		Score		2.752	2.698	1.498	1.455	1.453	1.42	1.405	1.369	1.327
		P. palmivora	Clade 4	P. palmivora	P. palmivora	P. chlamydospora × amnicola	P. cinnamomi	P. lacustris	P. plurivora	P. cambivora	P. rosacearum	P. cinnamomi
		453.11		453.11/2	453.11	803.16/1	534.11/3	385.10/2	029.06	286.09/1	544.11/1	534.11
		Score		2.752	2.698	1.498	1.455	1.453	1.42	1.405	1.369	1.327
		P. chlamydospora x amnicola	Clade 6b	P. chlamydospora × amnicola	P. chlamydospora × amnicola	P. lacustris	P. lacustris	P. lacustris	P. chlamydospora × amnicola	P. lacustris	P. lacustris	P. chlamydospora × amnicola
		803.16		803.16/3	803.16/2	361.09/1	361.09/2	385.10/3	806.16/1	398.10/2	361.09	806.16/3
		Score		2.84	2.757	2.1	2.013	1.976	1.965	1.93	1.874	1.874
		P. chlamydospora x amnicola	Clade 6b	P. chlamydospora × amnicola	P. chlamydospora × amnicola	P. lacustris	P. chlamydospora × amnicola	P. megasperma	P. chlamydospora × amnicola	P. lacustris	P. lacustris	P. lacustris
		806.16		806.16/3	806.16/2	361.09	803.16/1	778.15/2	803.16/3	385.10	295.09/1	295.09/2
		Score		2.682	2.654	2.071	1.964	1.901	1.877	1.872	1.871	1.868
		P. gonapodyides	Clade 6b	P. gonapodyides	P. gonapodyides	P. gonapodyides	P. gonapodyides	P. gonapodyides	P. gonapodyides	P. gonapodyides	P. megasperma	P. megasperma
		408.10		408.10/2	408.10	408.10	419.10/2	419.10/1	002.06	419.10	617.12/2	778.15/1
		Score		2.873	2.554	2.498	2.415	2.367	2.249	2.227	1.779	1.716
		P. gonapodyides	Clade 6b	P. gonapodyides	P. gonapodyides	P. gonapodyides	P. gonapodyides	P. gonapodyides	P. gonapodyides	P. gonapodyides	P. megasperma	P. megasperma
		408.10		408.10/2	408.10	408.10	419.10/2	419.10/1	002.06	419.10	617.12/2	778.15/1
		Score		2.873	2.554	2.498	2.415	2.367	2.249	2.227	1.779	1.716
		P. gonapodyides	Clade 6b	P. gonapodyides	P. gonapodyides	P. gonapodyides	P. gonapodyides	P. gonapodyides	P. gonapodyides	P. lacustris	P. gonapodyides	P. rosacearum
		419.10		419.10/2	408.10/1	408.10/2	002.06	419.10	408.10	361.09/1	408.10	544.12/3
		Score		2.797	2.369	2.347	2.237	2.2	1.983	1.875	1.856	1.802
		P. gonapodyides	Clade 6b	P. gonapodyides	P. gonapodyides	P. gonapodyides	P. gonapodyides	P. gonapodyides	P. gonapodyides	P. lacustris	P. gonapodyides	P. rosacearum
		419.10		419.10/2	408.10/1	408.10/2	002.06	419.10	408.10	361.09/1	408.10	544.12/3
		Score		2.797	2.369	2.347	2.237	2.2	1.983	1.875	1.856	1.802
		P. gregata	Clade 6b	P. gregata	P. gregata	P. gregata	P. gregata	P. gregata	P. rosacearum	P. megasperma	P. megasperma	P. taxon Walnut
		673.13		673.13/2	673.13/3	865.17/1	865.17/2	865.17/3	829.17/3	778.15/3	617.12/1	831.17/2
		Score		2.858	2.809	2.809	2.773	2.718	1.756	1.706	1.704	1.697
		P. gregata	Clade 6b	P. gregata	P. gregata	P. gregata	P. gregata	P. gregata	P. taxon Walnut	P. taxon Walnut	P. megasperma	P. rosacearum
		865.17		865.17/2	673.13/2	673.13/1	673.13/3	865.17/3	831.17/3	831.17/2	617.12/1	829.17/3
		Score		2.888	2.809	2.806	2.787	2.756	1.836	1.764	1.707	1.658
		P. lacustris	Clade 6b	P. lacustris	P. lacustris	P. lacustris	P. lacustris	P. lacustris	P. lacustris	P. lacustris	P. lacustris	P. lacustris
		295.09		295.09/2	361.09/2	361.09/1	295.09	361.09	385.10	385.10/2	385.10	398.10/1
		Score		2.759	2.64	2.591	2.536	2.362	2.218	2.171	2.149	1.995
		P. lacustris	Clade 6b	P. lacustris	P. lacustris	P. lacustris	P. lacustris	P. lacustris	P. lacustris	P. lacustris	P. lacustris	P. lacustris
		361.09		361.09/2	385.10/2	295.09/1	385.10	295.09/2	361.09	385.10	295.09	398.10/1
		Score		2.796	2.668	2.593	2.589	2.464	2.463	2.423	2.378	2.352
		P. lacustris	Clade 6b	P. lacustris	P. lacustris	P. lacustris	P. lacustris	P. lacustris	P. lacustris	P. lacustris	P. lacustris	P. lacustris
		361.09		361.09/2	385.10/2	295.09/1	385.10	295.09/2	361.09	385.10	295.09	398.10/1
		Score		2.796	2.668	2.593	2.589	2.464	2.463	2.423	2.378	2.352
		P. lacustris	Clade 6b	P. lacustris	P. lacustris	P. lacustris	P. lacustris	P. lacustris	P. lacustris	P. lacustris	P. lacustris	P. lacustris
		385.10		385.10/2	385.10	361.09/1	385.10/3	361.09/2	361.09	398.10/1	398.10	398.10/2
		Score		2.749	2.599	2.586	2.578	2.445	2.439	2.426	2.347	2.312
		P. lacustris	Clade 6b	P. lacustris	P. lacustris	P. lacustris	P. lacustris	P. lacustris	P. lacustris	P. lacustris	P. lacustris	P. lacustris
		398.10		398.10/2	398.10	385.10	385.10/2	361.09/1	385.10	361.09/2	385.10/3	361.09
		Score		2.747	2.537	2.439	2.431	2.352	2.317	2.293	2.246	2.069
		P. lacustris	Clade 6b	P. lacustris	P. lacustris	P. lacustris	P. lacustris	P. lacustris	P. lacustris	P. lacustris	P. lacustris	P. lacustris
		398.10		398.10/2	398.10	385.10	385.10/2	361.09/1	385.10	361.09/2	385.10/3	361.09
		Score		2.747	2.537	2.439	2.431	2.352	2.317	2.293	2.246	2.069
		P. megasperma	Clade 6b	P. megasperma	P. megasperma	P. megasperma	P. megasperma	P. megasperma	P. chlamydospora × amnicola	P. gregata	P. gregata	P. rosacearum
		617.12		617.12/3	617.12/2	778.15/3	778.15/2	778.15/1	806.16/1	673.13/2	865.17/2	544.11/2
		Score		2.799	2.791	2.63	2.475	2.432	1.826	1.753	1.743	1.738
		P. megasperma	Clade 6b	P. megasperma	P. megasperma	P. megasperma	P. megasperma	P. megasperma	P. taxon Raspberry	P. taxon Raspberry	P. taxon Raspberry	P. taxon Walnut
		778.15		778.15/3	617.12/2	778.15/2	617.12/1	617.12/3	483.11/2	483.11/1	483.11/3	518.11/2
		Score		2.594	2.544	2.437	2.427	2.363	2.034	1.964	1.912	1.817
		P. rosacearum	Clade 6b	P. rosacearum	P. rosacearum	P. rosacearum	P. lacustris	P. megasperma	P. taxon Walnut	P. gregata	P. lacustris	P. lacustris
		544.12		544.12/3	544.11/2	829.17/3	361.09/2	617.12/2	518.11/1	865.17/3	398.10/1	295.09/1
		Score		2.648	2.56	1.899	1.845	1.815	1.762	1.752	1.747	1.729
		P. rosacearum	Clade 6b	P. rosacearum	P. rosacearum	P. gregata	P. rosacearum	P. rosacearum	P. gregata	P. gregata	P. gregata	P. taxon Walnut
		829.17		829.17/3	829.17/2	673.13/2	544.11/2	544.12/3	865.17/3	865.17/2	673.13/3	518.11/2
		Score		2.872	2.867	1.785	1.767	1.738	1.694	1.639	1.609	1.574
		P. taxon Raspberry	Clade 6b	P. taxon Raspberry	P. taxon Raspberry	P. megasperma	P. chlamydospora × amnicola	P. gonapodyides	P. gregata	P. citrophthora	P. gonapodyides	P. cactorum
		483.11		483.11/3	483.11/2	778.15/1	803.16/3	419.10/2	865.17/2	635.13/2	419.10	862.17/3
		Score		2.805	2.493	1.766	1.686	1.633	1.564	1.56	1.556	1.525
		P. taxon Walnut	Clade 6b	P. taxon Walnut	P. taxon Walnut	P. taxon Walnut	P. taxon Walnut	P. taxon Walnut	P. rosacearum	P. gonapodyides	P. gregata	P. gonapodyides
		518.11		518.11/2	518.11/3	831.17/3	831.17/2	831.17/1	544.12/3	408	865.17/3	408.10/1
		Score		2.685	2.638	2.403	2.386	2.383	1.868	1.683	1.638	1.626
		P. taxon Walnut	Clade 6b	P. taxon Walnut	P. taxon Walnut	P. taxon Walnut	P. taxon Walnut	P. taxon Walnut	P. rosacearum	P. rosacearum	P. rosacearum	P. lacustris
		831.17		831.17/3	831.17/2	518.11/1	518.11/3	518.11/2	829.17/3	829.17/2	544.12/3	361.09
		Score		2.709	2.676	2.403	2.294	2.284	1.782	1.74	1.655	1.641
		P. alni subsp. alni	Clade 7a	P. alni subsp. alni	P. alni subsp. alni	P. alni subsp. alni	P. alni subsp. uniformis	P. alni subsp. uniformis	P. alni subsp. uniformis	P. rubi	P. rubi	P. cambivora
		240.08		240.08/1	012.06	240.08/2	299.09	299.09/1	299.09/2	734.14/3	734.14/2	393.10
		Score		2.497	2.463	2.452	2.449	2.447	2.412	2.365	2.311	2.309
		P. alni subsp. uniformis	Clade 7a	P. alni subsp. uniformis	P. alni subsp. uniformis	P. cambivora	P. alni subsp. uniformis	P. cambivora	P. alni subsp. alni	P. cambivora	P. rubi	P. rubi
		239.08		239.08/1	239.08/2	416.10	299.09/1	286.09	240.08	286.09/1	734.14/2	734.14/1
		Score		2.42	2.326	2.188	2.177	2.14	2.135	2.087	2.078	2.062
		P. alni subsp. uniformis	Clade 7a	P. alni subsp. uniformis	P. alni subsp. uniformis	P. alni subsp. alni	P. alni subsp. uniformis	P. alni subsp. alni	P. alni subsp. uniformis	P. alni subsp. alni	P. rubi	P. rubi
		299.09		299.09	299.09/2	240.08	239.08/2	240.08/1	239.08/1	240.08/2	734.14/3	734.14/2
		Score		2.621	2.533	2.488	2.455	2.445	2.422	2.406	2.354	2.303
		P. cambivora	Clade 7a	P. cambivora	P. cambivora	P. cambivora	P. cambivora	P. cambivora	P. alni subsp. uniformis	P. cambivora	P. alni subsp. alni	P. alni subsp. uniformis
		286.09		416.10	286.09/1	286.09/2	393.10	393.10/2	239.08	393.10/1	012.06	239.08/1
		Score		2.595	2.591	2.518	2.357	2.326	2.275	2.24	2.235	2.164
		P. cambivora	Clade 7a	P. cambivora	P. cambivora	P. cambivora	P. alni subsp. uniformis	P. cambivora	P. cambivora	P. alni subsp. uniformis	P. rubi	P. alni subsp. uniformis
		393.10		393.10/2	393.10	286.09/1	299.09	020.06	286.09	299.09/1	734.14/1	299.09/2
		Score		2.774	2.603	2.292	2.285	2.25	2.241	2.233	2.231	2.18
		P. cambivora	Clade 7a	P. cambivora	P. cambivora	P. cambivora	P. alni subsp. uniformis	P. cambivora	P. cambivora	P. alni subsp. uniformis	P. rubi	P. alni subsp. uniformis
		393.10		393.10/2	393.10	286.09/1	299.09	020.06	286.09	299.09/1	734.14/1	299.09/2
		Score		2.774	2.603	2.292	2.285	2.25	2.241	2.233	2.231	2.18
		P. rubi	Clade 7a	P. rubi	P. rubi	P. alni subsp. uniformis	P. alni subsp. uniformis	P. alni subsp. alni	P. cambivora	P. alni subsp. uniformis	P. alni subsp. uniformis	P. cambivora
		734.14		734.14/2	734.14/3	239.08/2	299.09/1	240.08	393.10/2	239.08/1	299.09	393.10/1
		Score		2.782	2.782	2.344	2.297	2.294	2.265	2.264	2.247	2.236
		P. cinnamomi	Clade 7c	P. cinnamomi	P. cinnamomi	P. cinnamomi	P. cinnamomi	P. cinnamomi	P. cinnamomi	P. cinnamomi	P. multivora	P. cambivora
		382.10		382.10/1	534.11	382.10/2	534.11/1	534.11/3	534.11/2	114.07	366.09	416.10
		Score		2.685	2.629	2.573	2.451	2.439	2.36	2.3	1.438	1.381
		P. cinnamomi	Clade 7c	P. cinnamomi	P. cinnamomi	P. cinnamomi	P. cinnamomi	P. cinnamomi	P. cinnamomi	P. cinnamomi	P. palmivora	P. cambivora
		534.11		534.11/3	534.11	534.11/2	382.10/1	382.10/2	382.10	114.07	453.11	416.10
		Score		2.888	2.735	2.686	2.674	2.552	2.452	1.929	1.37	1.278
		P. cryptogea	Clade 8a	P. cryptogea	P. cryptogea	P. cryptogea	P. cryptogea	P. cryptogea	P. cf. kelmania	P. cf. kelmania	P. cf. kelmania	P. pseudosyringae
		812.16		812.16/2	846.17/2	812.16/3	846.17/1	846.17/3	456.11/3	456.11/2	456.11/1	772.15/1
		Score		2.792	2.782	2.777	2.734	2.678	2.46	2.39	2.353	1.665
		P. cryptogea	Clade 8a	P. cryptogea	P. cryptogea	P. cryptogea	P. cryptogea	P. cryptogea	P. cf. kelmania	P. cf. kelmania	P. cf. kelmania	P. gonapodyides
		846.17		846.17/2	812.16/1	846.17/3	812.16/2	812.16/3	456.11/3	456.11/1	456.11/2	419.10/2
		Score		2.79	2.737	2.678	2.633	2.592	2.356	2.275	2.25	1.723
		P. cf. kelmania	Clade 8a	P. cf. kelmania	P. cf. kelmania	P. cryptogea	P. cryptogea	P. cryptogea	P. cryptogea	P. cryptogea	P. cryptogea	P. citrophthora
		456.11		456.11/2	456.11/3	812.16/2	846.17/3	812.16/1	812.16/3	846.17/2	846.17/1	635.13/3
		Score		2.817	2.746	2.409	2.374	2.352	2.351	2.333	2.274	1.688
		P. cf. kelmania	Clade 8a	P. cf. kelmania	P. cf. kelmania	P. cryptogea	P. cryptogea	P. cryptogea	P. cryptogea	P. cryptogea	P. cryptogea	P. citrophthora
		456.11		456.11/2	456.11/3	812.16/2	846.17/3	812.16/1	812.16/3	846.17/2	846.17/1	635.13/3
		Score		2.817	2.746	2.409	2.374	2.352	2.351	2.333	2.274	1.688
		P. ramorum	Clade 8c	P. ramorum	P. ramorum	P. ramorum	P. ramorum	P. ramorum	P. syringae	P. cf. kelmania	P. cryptogea	P. cf. kelmania
		345.09		754.15/2	345.09/2	754.15/3	345.09/3	754.15/1	620.12/1	456.11/1	846.17/1	456.11/2
		Score		2.726	2.72	2.649	2.581	2.573	1.491	1.358	1.281	1.259
		P. ramorum	Clade 8c	P. ramorum	P. ramorum	P. ramorum	P. ramorum	P. ramorum	P. cf. kelmania	P. syringae	P. cf. kelmania	P. taxon Walnut
		754.15		754.15/3	345.09/3	345.09/2	754.15/2	345.09	456.11/3	620.12/3	456.11/2	518.11/3
		Score		2.804	2.784	2.72	2.612	2.572	1.369	1.239	1.165	1.103
		P. syringae	Clade 8d	P. syringae	P. syringae	P. cf. kelmania	P. chlamydospora × amnicola	P. pseudosyringae	P. rosacearum	P. taxon Raspberry	P. cinnamomi	P. rosacearum
		620.12		620.12/3	620.12/2	456.11/3	803.16/3	772.15/1	544.12/3	483.11/1	382.10/1	544.11/2
		Score		2.886	2.881	1.642	1.396	1.352	1.348	1.291	1.242	1.238
		P. polonica	Clade 9a	P. polonica	P. polonica	P. hedraiandra	P. hedraiandra	P. rosacearum	P. hedraiandra	P. citrophthora	P. cactorum	P. cf. kelmania
		766.15		766.15/2	766.15/3	578.12/1	578.12/3	544.11/1	578.12/2	635.13/1	862.17/2	456.11/1
		Score		2.738	2.728	1.721	1.691	1.634	1.561	1.536	1.528	1.477
		P. polonica	Clade 9a	P. polonica	P. polonica	P. hedraiandra	P. hedraiandra	P. rosacearum	P. hedraiandra	P. citrophthora	P. cactorum	P. cf. kelmania
		766.15		766.15/2	766.15/3	578.12/1	578.12/3	544.11/1	578.12/2	635.13/1	862.17/2	456.11/1
		Score		2.738	2.728	1.721	1.691	1.634	1.561	1.536	1.528	1.477
		Pythium folliculosum		Pythium folliculosum	Pythium folliculosum	P. rubi	P. alni subsp. alni	P. cambivora	P. alni subsp. uniformis	P. rubi	P. alni subsp. uniformis	P. alni subsp. uniformis
		890.17		890.17/2	890.17/3	734.14/1	240.08	286.09/2	299.09/1	734.14/2	239.08	239.08/1
		Score		2.59	2.548	1.578	1.478	1.468	1.387	1.353	1.303	1.288
